# Supplementary material
Source: PubMed Central journal article supplement (PMC3490595)
Supplement: supp_pp.112.204420_204420suppfig.pdf [file supp_pp.112.204420_204420suppfig.pdf]

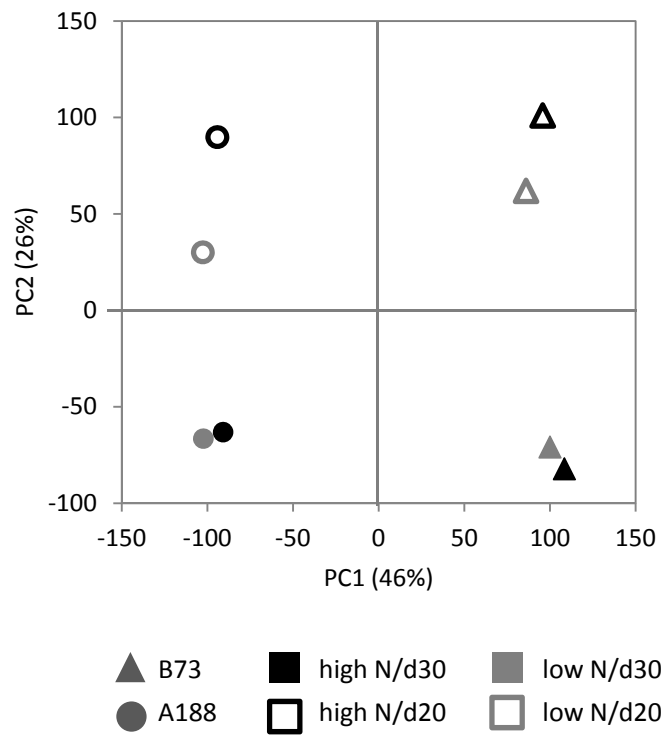

**Figure S7.1** . PCA organisation of transcript data (41780 features) after PC1 (46%) and PC 2 (26%).

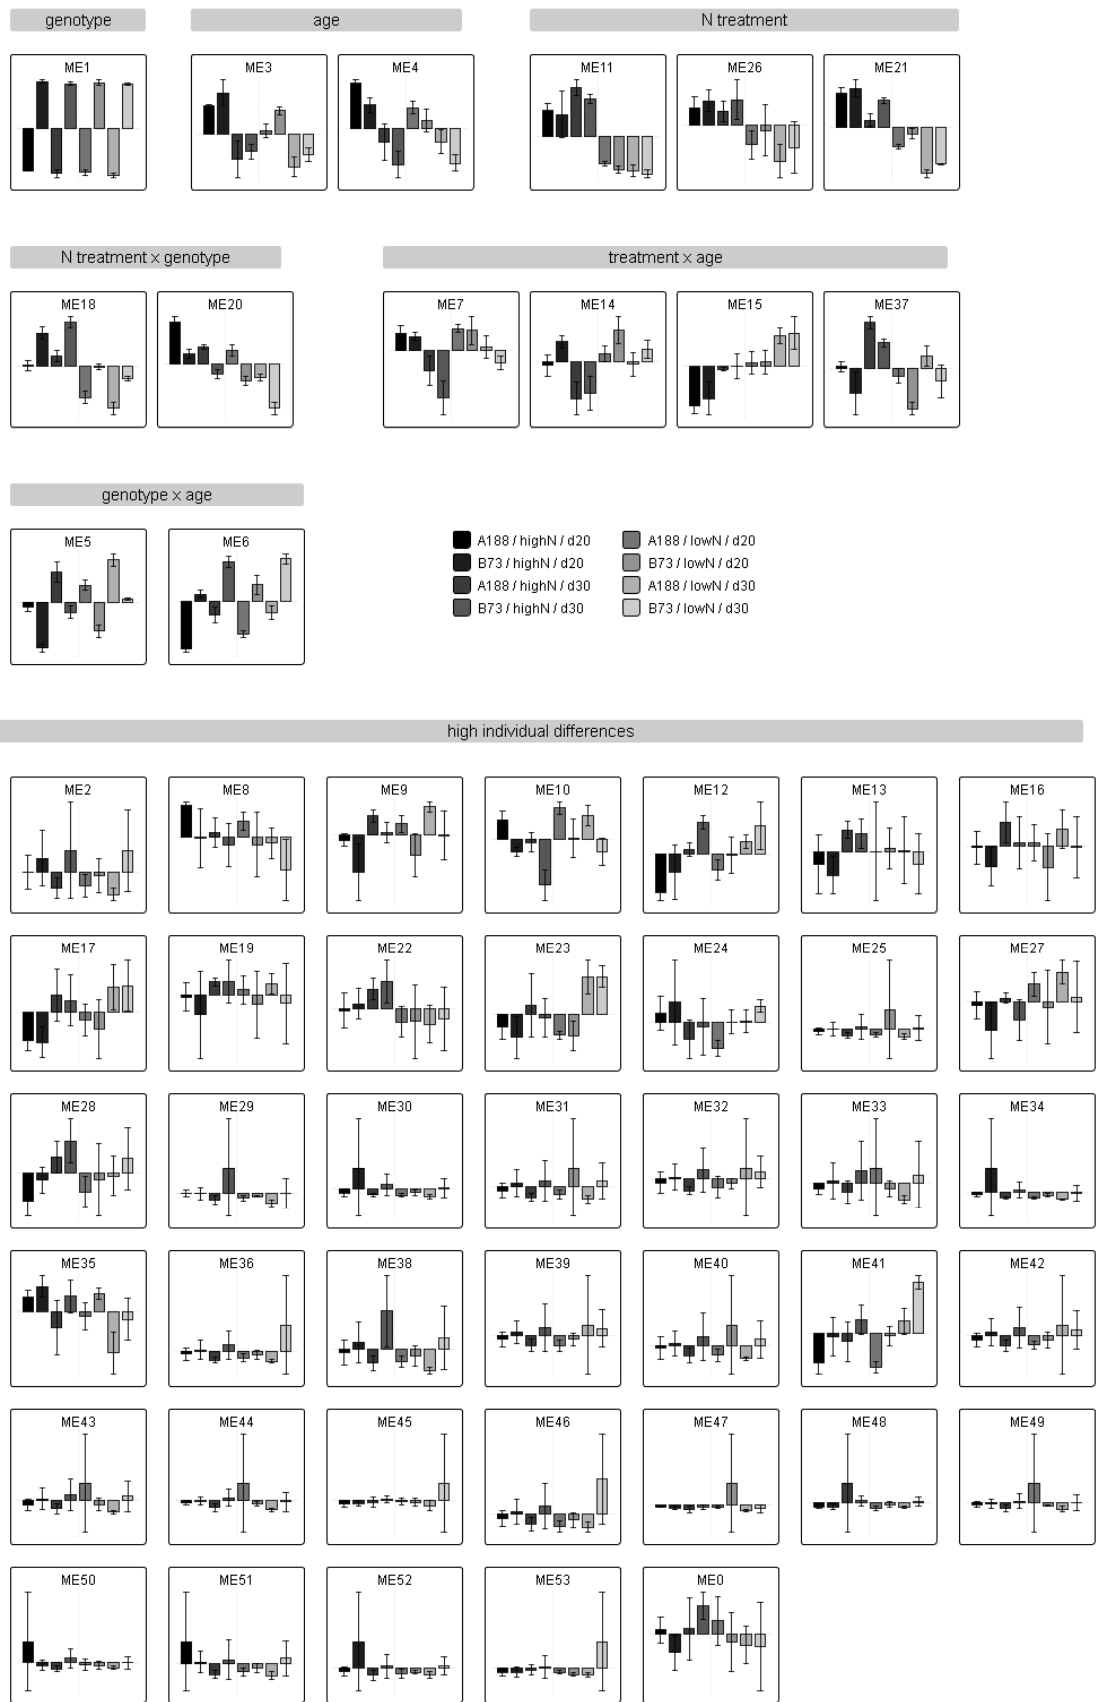

**Figure S7.2.** Overview of expression pattern in ME modules (eigengene). The modules are sorted according to influence by experimental parameter: N treatment, age and genotype. Module pattern were calculated using WGCNA of individual sample, graphs show average data from 4 replicats.
